## Erratum

**Kirchner, J., Kam, Z., Tzur, G., Bershadsky, A. D. and Geiger, B.** (2003). Live-cell monitoring of tyrosine phosphorylation in focal adhesions following microtubule disruption. *J. Cell Sci.* **116**, 975-986.

We apologize for omitting the reference Kaverina et al., 2000 from the reference list in both the online and print versions of this paper. The full reference details are given below.

**Kaverina, I., Krylyshkina, O., Gimona, M., Beningo, K., Wang, Y. L. and Small, J. V.** (2000). Enforced polarisation and locomotion of fibroblasts lacking microtubules. *Curr. Biol.* **10**, 739-742.
